# Supplementary material for: Linoleate-Rich Safflower Oil Diet Increases Linoleate-Derived Bioactive Lipid Mediators in Plasma, and Brown and White Adipose Depots of Healthy Mice
Source: MDPI journal article supplement (doi:10.3390/metabo12080743), 2022-08-12
Supplement: s1 [file s1]

**Table S1.** Comparison of AIN-93G diets containing palm oil (POLF) or linoleate-rich safflower oil (SOLF) as the fat source.

|                              | POLF Diet |        | SOLF Diet |        |
|------------------------------|-----------|--------|-----------|--------|
| Macronutrient                | Gram %    | Kcal % | Gram %    | Kcal % |
| Protein                      | 15        | 15     | 15        | 15     |
| Carbohydrate                 | 71        | 71     | 71        | 71     |
| Fat                          | 6         | 14     | 6         | 14     |
| Total                        |           | 100    | 3.95      |        |
| Kcal/gram                    | 3.95      |        |           | 100    |
| Ingredient (per kilogram)    | Gram      | Kcal   | Gram      | Kcal   |
| Casein                       | 145       | 580    | 145       | 580    |
| L-Cysteine                   | 1.8       | 1762   | 1.8       | 7      |
| Corn starch                  | 440.588   | 620    | 440.588   | 1762   |
| Maltodextrin                 | 155       | 400    | 155       | 620    |
| Sucrose                      | 100       | 0      | 100       | 400    |
| Cellulose                    | 50        | 540    | 50        | 0      |
| Palm oil                     | 60        | 0      | 0         | 0      |
| Safflower oil, high-linoleic | 0         | 0      | 60        | 540    |
| t-butylhydroquinone          | .012      | 0      | .012      | 0      |
| Mineral mix                  | 35        | 0      | 35        | 0      |
| Vitamin mix                  | 10        | 40     | 10        | 40     |
| Choline bitartrate           | 2.5       | 0      | 2.5       | 0      |
| Yellow dye #5                | 0.1       | 0      | 0.05      | 0      |
| Red dye #40                  | 0         | 0      | 0.05      | 0      |
| Blue dye #1                  | 1         | 0      | 0         | 0      |
| Total                        | 1000      | 3950   | 1000      | 3950   |

|           |        |                     |        | BAT                             |                                 |                 | WAT                             |                                 |                 | Plasma                      |                             |                 | Average fold difference in SOLF vs POLF |             |             |
|-----------|--------|---------------------|--------|---------------------------------|---------------------------------|-----------------|---------------------------------|---------------------------------|-----------------|-----------------------------|-----------------------------|-----------------|-----------------------------------------|-------------|-------------|
|           |        | Metabolite          | Enzyme | POLF Mean $\pm$ 95% CI (pmol/g) | SOLF Mean $\pm$ 95% CI (pmol/g) | T-test P-value  | POLF Mean $\pm$ 95% CI (pmol/g) | SOLF Mean $\pm$ 95% CI (pmol/g) | T-test P-value  | POLF Mean $\pm$ 95% CI (nM) | SOLF Mean $\pm$ 95% CI (nM) | T-test P-value  | BAT                                     | WAT         | Plasma      |
| PGs       | 20:3n6 | PGE1                | COX2   | 1.68 $\pm$ 0.85                 | 3.33 $\pm$ 2.10                 | 0.17            | 1.74 $\pm$ 0.94                 | 3.28 $\pm$ 1.81                 | 0.21            | ND                          | ND                          | -               |                                         |             |             |
|           | 20:4n6 | 6-keto-PGF1a        | COX1   | 15.4 $\pm$ 4.30                 | 27.5 $\pm$ 8.45                 | <b>0.01</b>     | 13.7 $\pm$ 6.94                 | 19.9 $\pm$ 6.91                 | <b>0.01</b>     | 2.84 $\pm$ 2.01             | 2.32 $\pm$ 1.79             | 0.64            | <b>1.79</b>                             | <b>1.45</b> | 0.81        |
|           |        | PGE1                | COX2   | 1.77 $\pm$ 0.79                 | 3.34 $\pm$ 2.10                 | 0.065           | 1.74 $\pm$ 0.94                 | 3.28 $\pm$ 1.81                 | 0.34            | ND                          | ND                          | -               | 1.88                                    | 1.89        | -           |
|           |        | PGE2                | COX2   | 21.7 $\pm$ 7.81                 | 39.2 $\pm$ 15.3                 | <b>0.03</b>     | 21.27 $\pm$ 11.6                | 38.5 $\pm$ 14.7                 | 0.15            | 0.85 $\pm$ 0.85             | 1.12 $\pm$ 0.66             | 0.18            | <b>1.81</b>                             | 1.81        | 1.31        |
|           |        | PGD2                | COX2   | 10.7 $\pm$ 4.14                 | 16.5 $\pm$ 10.2                 | 0.31            | 11.2 $\pm$ 5.15                 | 23.7 $\pm$ 15.0                 | 0.25            | ND                          | ND                          | -               | 1.54                                    | 2.13        | -           |
|           |        | 15-deoxy-PGJ2       | COX2   | 2.01 $\pm$ 0.34                 | 2.11 $\pm$ 0.48                 | 0.87            | 2.33 $\pm$ 0.51                 | 2.23 $\pm$ 0.46                 | 0.7             | ND                          | ND                          | -               | 1.05                                    | 0.96        | -           |
|           |        | F2 isoprostanes     | COX2   | 2.27 $\pm$ 0.52                 | 2.59 $\pm$ 0.61                 | 0.56            | 2.13 $\pm$ 0.46                 | 2.22 $\pm$ 0.78                 | 0.75            | 5.31 $\pm$ 1.95             | 7.36 $\pm$ 1.67             | 0.15            | 1.78                                    | 1.04        | 1.38        |
|           |        | PGF2a               | COX2   | 6.42 $\pm$ 1.93                 | 15.2 $\pm$ 5.41                 | <b>0.006</b>    | 5.36 $\pm$ 2.17                 | 10.7 $\pm$ 2.80                 | <b>0.02</b>     | 0.97 $\pm$ 0.51             | 2.34 $\pm$ 2.06             | 0.82            | <b>2.37</b>                             | <b>1.99</b> | 1.38        |
| Hydroxyls | 18:2n6 | 13-HODE             | LOX    | 415 $\pm$ 164                   | 1801 $\pm$ 811                  | <b>&lt;.001</b> | 996 $\pm$ 401                   | 3065 $\pm$ 755                  | <b>&lt;.001</b> | 16.3 $\pm$ 5.60             | 72.0 $\pm$ 36.0             | <b>&lt;.001</b> | <b>4.34</b>                             | <b>3.08</b> | <b>4.43</b> |
|           |        | 9-HODE              | LOX    | 248 $\pm$ 76.9                  | 1160 $\pm$ 525                  | <b>&lt;.001</b> | 587 $\pm$ 232                   | 1762 $\pm$ 414                  | <b>&lt;.001</b> | 8.14 $\pm$ 3.45             | 28.9 $\pm$ 12.8             | <b>&lt;.001</b> | <b>4.68</b>                             | <b>3.00</b> | <b>3.55</b> |
|           | 18:3n3 | 13-HOTE             | LOX    | 23.5 $\pm$ 13.6                 | 21.9 $\pm$ 8.70                 | 0.64            | 84.3 $\pm$ 55.2                 | 92.2 $\pm$ 56.6                 | 0.94            | 0.53 $\pm$ 0.17             | 0.81 $\pm$ 0.16             | 0.061           | 0.93                                    | 1.09        | 1.53        |
|           |        | 9-HOTE              | LOX    | 2.59 $\pm$ 0.76                 | 4.17 $\pm$ 2.29                 | 0.34            | 6.32 $\pm$ 2.81                 | 7.72 $\pm$ 2.66                 | 0.44            | 0.15 $\pm$ 0.06             | 0.17 $\pm$ .06              | 0.62            | 1.61                                    | 1.22        | 1.14        |
|           | 20:4n6 | 15-HETE             | LOX    | 32.9 $\pm$ 9.63                 | 71.4 $\pm$ 17.4                 | <b>&lt;.001</b> | 49.1 $\pm$ 13.4                 | 109 $\pm$ 41.3                  | <b>0.009</b>    | 8.92 $\pm$ 4.75             | 22.8 $\pm$ 20.2             | 0.21            | <b>2.17</b>                             | <b>2.22</b> | 2.55        |
|           |        | 5-HETE              | LOX    | 94.1 $\pm$ 37.4                 | 235 $\pm$ 90.5                  | <b>0.002</b>    | 136 $\pm$ 65.8                  | 276 $\pm$ 132                   | 0.059           | 584 $\pm$ 276               | 1834 $\pm$ 1505             | 0.16            | <b>2.50</b>                             | 2.03        | 3.13        |
|           |        | 11-HETE             | LOX    | 14.4 $\pm$ 3.65                 | 34.7 $\pm$ 10.7                 | <b>0.002</b>    | 16.3 $\pm$ 4.84                 | 31.8 $\pm$ 4.57                 | <b>&lt;.001</b> | 7.35 $\pm$ 4.07             | 17.9 $\pm$ 15.4             | 0.25            | <b>2.41</b>                             | <b>1.95</b> | 2.43        |
|           |        | 9-HETE              | Auto   | 7.28 $\pm$ 1.86                 | 15.3 $\pm$ 6.75                 | 0.084           | 6.81 $\pm$ 2.58                 | 13.7 $\pm$ 3.26                 | <b>0.01</b>     | 1.43 $\pm$ 0.95             | 0.79 $\pm$ 0.19             | 0.74            | <b>2.1</b>                              | <b>2.00</b> | <b>0.55</b> |
|           |        | 8-HETE              | LOX    | 15.6 $\pm$ 8.50                 | 24.3 $\pm$ 7.35                 | 0.098           | 15.8 $\pm$ 4.87                 | 36.4 $\pm$ 12.09                | <b>0.004</b>    | ND                          | ND                          | -               | 2.09                                    | <b>2.30</b> | -           |
|           |        | 5-HETE              | LOX    | 19.2 $\pm$ 5.03                 | 35.6 $\pm$ 12.2                 | 0.053           | 14.8 $\pm$ 3.82                 | 32.9 $\pm$ 9.46                 | <b>0.005</b>    | 16.8 $\pm$ 13.7             | 13.1 $\pm$ 1.7              | 0.8             | <b>2.00</b>                             | <b>2.20</b> | 0.77        |
|           |        | 15-HETE-EA          | LOX    | .053 $\pm$ .056                 | .069 $\pm$ .040                 | 0.35            | .030 $\pm$ .019                 | .116 $\pm$ .054                 | 0.052           | ND                          | ND                          | -               | 1.31                                    | 3.95        | -           |
|           | 20:5n3 | 15-HEPE             | LOX    | 1.40 $\pm$ 0.70                 | 1.62 $\pm$ 0.61                 | 0.34            | 4.71 $\pm$ 2.60                 | 5.82 $\pm$ 4.52                 | 0.95            | ND                          | ND                          | -               | 1.86                                    | 2.23        | -           |
|           |        | 12-HEPE             | LOX    | 1.27 $\pm$ 0.47                 | 1.78 $\pm$ 0.63                 | 0.14            | 2.30 $\pm$ 0.99                 | 2.69 $\pm$ 1.33                 | 0.9             | 4.80 $\pm$ 2.15             | 7.93 $\pm$ 6.62             | 0.14            | 1.65                                    | 1.4         | 1.17        |
|           |        | 9-HEPE              | LOX    | 0.54 $\pm$ 0.18                 | 0.47 $\pm$ 0.24                 | 0.56            | 0.44 $\pm$ 0.25                 | 0.82 $\pm$ 0.45                 | 0.26            | ND                          | ND                          | -               | 1.4                                     | 1.17        | -           |
|           |        | 5-HEPE              | LOX    | 1.07 $\pm$ 0.17                 | 0.86 $\pm$ 0.33                 | 0.18            | 0.53 $\pm$ 0.23                 | 1.01 $\pm$ 0.50                 | 0.24            | 0.99 $\pm$ 0.83             | 0.60 $\pm$ 0.34             | 0.55            | 0.61                                    | 0.8         | 1.9         |
|           | 22:6n3 | 17-HDoHE            | LOX    | 26.5 $\pm$ 12.0                 | 32.7 $\pm$ 14.5                 | 0.46            | 75.3 $\pm$ 35.2                 | 106 $\pm$ 69.9                  | 0.69            | 3.95 $\pm$ 2.48             | 3.83 $\pm$ 1.48             | 0.87            | 1.23                                    | 1.41        | 0.97        |
|           |        | 14-HDoHE            | LOX    | 42.9 $\pm$ 18.3                 | 49.0 $\pm$ 23.1                 | 0.64            | 106 $\pm$ 53.7                  | 143 $\pm$ 96.5                  | 0.7             | 68.7 $\pm$ 27.0             | 146 $\pm$ 86.7              | 0.18            | 1.14                                    | 1.35        | 2.13        |
|           |        | 4-HDoHE             | LOX    | 2.32 $\pm$ 0.50                 | 2.73 $\pm$ 1.09                 | 0.96            | 3.28 $\pm$ 1.16                 | 2.92 $\pm$ 0.84                 | 0.65            | 2.84 $\pm$ 1.45             | 2.03 $\pm$ 0.52             | 0.36            | 1.18                                    | 0.89        | 0.72        |
| Diols     | 20:4n6 | LTB4                | LOX    | ND                              | ND                              | -               | ND                              | ND                              | -               | 0.44 $\pm$ 0.39             | 0.28 $\pm$ 0.19             | 0.6             | -                                       | -           | 0.64        |
|           |        | 6-trans-LTB4        | LOX    | 0.55 $\pm$ 0.22                 | 0.99 $\pm$ 0.41                 | 0.11            | 0.72 $\pm$ 0.30                 | 1.38 $\pm$ 0.27                 | <b>0.006</b>    | ND                          | ND                          | -               | 1.78                                    | <b>1.9</b>  | -           |
|           | 20:5n3 | 8,15-DiHETE         | LOX    | 7.03 $\pm$ 1.60                 | 13.97 $\pm$ 5.17                | <b>0.03</b>     | 6.81 $\pm$ 2.45                 | 15.2 $\pm$ 4.09                 | <b>0.005</b>    | ND                          | ND                          | -               | <b>2</b>                                | <b>2.2</b>  | -           |
|           | 22:6n3 | Protectin DX        | LOX    | 0.31 $\pm$ 0.11                 | 0.37 $\pm$ 0.07                 | 0.21            | 0.46 $\pm$ 0.15                 | 0.76 $\pm$ 0.33                 | 0.26            | ND                          | ND                          | -               | 1.18                                    | 1.66        | -           |
| Triols    | 18:2n6 | 9,12,13-TriHOME (%) | Auto   | 96.7 $\pm$ 33.9                 | 283 $\pm$ 148                   | <b>0.009</b>    | 227 $\pm$ 150                   | 294 $\pm$ 107                   | 0.28            | ND                          | ND                          | -               | <b>2.9</b>                              | 1.29        | -           |
| Epoxides  | 18:2n6 | 12(13)-EpOME        | CYP    | 16.4 $\pm$ 4.71                 | 56.8 $\pm$ 19.9                 | <b>0</b>        | 39.4 $\pm$ 17.1                 | 97.4 $\pm$ 34.1                 | <b>0.01</b>     | 1.23 $\pm$ 0.33             | 5.31 $\pm$ 1.73             | <b>&lt;.001</b> | <b>3.5</b>                              | <b>2.5</b>  | <b>4.3</b>  |
|           |        | 9(10)-EpOME         | CYP    | 18.7 $\pm$ 5.96                 | 70.6 $\pm$ 28.2                 | <b>&lt;.001</b> | 42.4 $\pm$ 17.6                 | 117 $\pm$ 46.1                  | <b>0.007</b>    | 0.57 $\pm$ 0.26             | 1.03 $\pm$ 0.45             | 0.25            | <b>3.8</b>                              | <b>2.8</b>  | 1.81        |
|           | 18:3n3 | 15(16)-EpODE        | CYP    | 2.62 $\pm$ 0.68                 | 3.03 $\pm$ 0.62                 | 0.34            | 3.64 $\pm$ 1.35                 | 7.11 $\pm$ 4.73                 | 0.21            | 2.12 $\pm$ 0.49             | 2.87 $\pm$ 0.99             | 0.2             | 1.16                                    | 1.95        | 1.35        |
|           |        | 12(13)-EpODE        | CYP    | 0.32 $\pm$ 0.10                 | 0.27 $\pm$ 0.25                 | 0.11            | 0.74 $\pm$ 0.28                 | 0.84 $\pm$ 0.36                 | 0.71            | ND                          | ND                          | -               | 0.84                                    | 1.13        | -           |
|           |        | 9(10)-EpODE         | CYP    | 1.44 $\pm$ 0.44                 | 5.03 $\pm$ 3.30                 | <b>0.02</b>     | 3.72 $\pm$ 1.64                 | 20.0 $\pm$ 19.2                 | 0.054           | ND                          | ND                          | -               | <b>3.5</b>                              | 5.38        | -           |
|           | 20:4n6 | 14(15)-EpETrE       | CYP    | 3.63 $\pm$ 0.77                 | 6.29 $\pm$ 1.73                 | <b>0.02</b>     | 3.85 $\pm$ 0.86                 | 5.31 $\pm$ 0.81                 | <b>0.04</b>     | 0.72 $\pm$ 0.25             | 1.17 $\pm$ 0.49             | 0.22            | <b>1.7</b>                              | <b>1.4</b>  | 1.62        |
|           |        | 11(12)-EpETrE       | CYP    | 2.07 $\pm$ 0.52                 | 3.35 $\pm$ 1.00                 | <b>0.04</b>     | 1.88 $\pm$ 0.60                 | 2.83 $\pm$ 0.49                 | <b>0.04</b>     | 0.37 $\pm$ 0.09             | 0.56 $\pm$ 0.15             | 0.084           | <b>1.6</b>                              | <b>1.5</b>  | 1.49        |
|           |        | 8(9)-EpETrE         | CYP    | 5.90 $\pm$ 1.70                 | 5.49 $\pm$ 1.83                 | 0.59            | 8.34 $\pm$ 4.05                 | 7.48 $\pm$ 3.29                 | 0.66            | ND                          | ND                          | -               | 0.93                                    | 0.73        | -           |
|           | 22:6n3 | 19(20)-EpDPE        | CYP    | 3.17 $\pm$ 1.01                 | 2.21 $\pm$ 0.60                 | 0.15            | 3.55 $\pm$ 1.02                 | 2.62 $\pm$ 0.53                 | 0.14            | 3.98 $\pm$ 0.75             | 3.82 $\pm$ 1.17             | 0.63            | 0.7                                     | 0.74        | 0.96        |
|           |        | 16(17)-EpDPE        | CYP    | 0.87 $\pm$ 0.32                 | 0.91 $\pm$ 0.40                 | 0.65            | 1.36 $\pm$ 0.68                 | 0.68 $\pm$ 0.26                 | 0.28            | ND                          | ND                          | -               | 1.04                                    | 0.51        | -           |

Supplementary Table S2 (1 of 2)

**Supplementary Table S2 (2 of 2).** All lipid mediators measured in BAT, iWAT, and plasma of mice consuming POLF and SOLF diets. Targeted lipidomics was used to identify lipid mediators altered by diet in BAT, iWAT, and plasma. Lipid mediators are grouped by class and parent fatty acid. Average fold difference was calculated by dividing the average metabolite value for the SOLF diet group by that of the POLF diet group. A student's t-test was used to compare the mean oxylipin concentration between diet groups on log-transformed data, with bolded values in grey boxes indicating significant differences (P<.05). N=7-9 mice per group. ND= not detected or low abundance (>25% missing values). Enzymatic pathway abbreviations: COX – cyclooxygenase; LOX – lipoxygenase; Auto- auto-oxidation; CYP – cytochrome P450; sEH – soluble epoxide hydrolase; ADH – alcohol dehydrogenase; PLD – phospholipase D.

|                     |               | Metabolite       | Enzyme      | BAT                         |                             |                | WAT                         |                             |                | Plasma                  |                         |                | Average fold difference in SOLF vs POLF |      |        |
|---------------------|---------------|------------------|-------------|-----------------------------|-----------------------------|----------------|-----------------------------|-----------------------------|----------------|-------------------------|-------------------------|----------------|-----------------------------------------|------|--------|
|                     |               |                  |             | POLF Mean ± 95% CI (pmol/g) | SOLF Mean ± 95% CI (pmol/g) | T-test P-value | POLF Mean ± 95% CI (pmol/g) | SOLF Mean ± 95% CI (pmol/g) | T-test P-value | POLF Mean ± 95% CI (nM) | SOLF Mean ± 95% CI (nM) | T-test P-value | BAT                                     | WAT  | Plasma |
| Vicinal Diols       | 18:2n6        | 12,13-DiHOME     | sEH         | 21.8 ± 4.36                 | 83.0 ± 31.1                 | 0              | 29.8 ± 9.88                 | 108.9 ± 24.3                | 0.0001         | 8.71 ± 1.84             | 34.1 ± 12.9             | 0              | 3.8                                     | 3.7  | 3.92   |
|                     |               | 9,10-DiHOME      | sEH         | 11.1 ± 1.22                 | 51.2 ± 14.2                 | 0              | 16.4 ± 5.59                 | 66.4 ± 8.56                 | 0              | 3.68 ± 0.63             | 16.8 ± 4.56             | 0              | 4.6                                     | 4.1  | 4.58   |
|                     | 18:3n3        | 15,16-DiHODE     | sEH         | 5.47 ± 2.03                 | 7.10 ± 2.41                 | 0.31           | 5.60 ± 2.31                 | 10.79 ± 3.20                | 0.02           | 0.38 ± 0.13             | 0.51 ± 0.24             | 0.8            | 1.3                                     | 1.9  | 1.34   |
|                     |               | 9,10-DiHODE      | sEH         | 0.48 ± 0.07                 | 0.73 ± 0.19                 | 0.02           | 0.61 ± 0.16                 | 1.09 ± 0.18                 | 0.003          | 0.05 ± 0.02             | 0.07 ± 0.06             | 0.66           | 1.5                                     | 1.8  | 1.65   |
|                     |               | 14,15-DiHETrE    | sEH         | 1.58 ± 0.54                 | 2.68 ± 0.54                 | 0.004          | 0.93 ± 0.15                 | 2.23 ± 0.32                 | 0              | 1.57 ± 0.14             | 3.26 ± 0.70             | 0              | 1.7                                     | 2.4  | 2.08   |
|                     | 20:4n6        | 11,12-DiHETrE    | sEH         | 1.14 ± 0.36                 | 1.64 ± 0.38                 | 0.07           | 0.55 ± 0.11                 | 1.28 ± 0.23                 | 0.0002         | 0.91 ± 0.12             | 1.80 ± 0.38             | 0              | 1.44                                    | 2.3  | 1.99   |
|                     |               | 8,9-DiHETrE      | sEH         | 1.83 ± 0.94                 | 2.41 ± 0.58                 | 0.11           | 1.02 ± 0.24                 | 1.57 ± 0.40                 | 0.13           | 2.68 ± 0.40             | 3.54 ± 0.60             | 0.03           | 1.31                                    | 1.54 | 1.32   |
|                     |               | 5,6-DiHETrE      | sEH         | 0.41 ± 0.16                 | 0.48 ± 0.16                 | 0.57           | 0.19 ± 0.06                 | 0.35 ± 0.10                 | 0.02           | 1.51 ± 0.26             | 2.15 ± 0.45             | 0.04           | 1.16                                    | 1.8  | 1.42   |
| 22:6n3              | 19,20-DiHDoPA | sEH              | 4.68 ± 2.34 | 4.08 ± 0.93                 | 0.98                        | 1.86 ± 0.48    | 2.67 ± 0.48                 | 0.04                        | 2.47 ± 0.36    | 2.08 ± 0.44             | 0.18                    | 0.87           | 1.4                                     | 0.84 |        |
| Ketones             | 18:2n6        | 13-KODE          | ADH         | 68.2 ± 37.5                 | 390 ± 288                   | 0.01           | 262 ± 169                   | 1898 ± 1961                 | 0.03           | 1.14 ± 0.47             | 3.71 ± 1.74             | 0.02           | 5.7                                     | 7.3  | 3.25   |
|                     |               | 9-KODE           | ADH         | 113 ± 71.1                  | 727 ± 565                   | 0.04           | 472 ± 322                   | 2227 ± 1547                 | 0.046          | 1.24 ± 0.44             | 6.97 ± 2.45             | 0.01           | 6.4                                     | 4.7  | 5.61   |
|                     |               | 12(13)-Ep-9-KODE | ADH         | 60.4 ± 16.3                 | 163 ± 102                   | 0.04           | 180 ± 110                   | 493 ± 237                   | 0.065          | ND                      | ND                      | -              | 2.7                                     | 2.74 | -      |
|                     | 20:4n6        | 15-KETE          | ADH         | 4.24 ± 1.73                 | 13.06 ± 4.91                | 0.008          | 5.96 ± 2.82                 | 12.7 ± 4.11                 | 0.04           | ND                      | ND                      | -              | 3.1                                     | 2.1  | -      |
|                     |               | 5-KETE           | ADH         | 6.97 ± 2.57                 | 11.63 ± 4.79                | 0.25           | 5.57 ± 4.15                 | 9.80 ± 2.18                 | 0.02           | ND                      | ND                      | -              | 1.67                                    | 1.8  | -      |
| N-Acylethanolamines | 16:00         | PEA              | PLD         | 331 ± 318                   | 448 ± 219                   | 0.29           | 189 ± 144                   | 746 ± 375                   | 0.007          | 10.54 ± 1.69            | 9.56 ± 2.10             | 0.44           | 1.35                                    | 3.9  | 0.91   |
|                     | 18:00         | SEA              | PLD         | ND                          | ND                          | -              | ND                          | ND                          | -              | 3.80 ± 1.08             | 4.07 ± 1.10             | 0.69           | -                                       | -    | 1.07   |
|                     | 16:1n7        | POEA (rel abs)   | PLD         | 127 ± 37                    | 87.2 ± 19.8                 | 0.089          | 92.1 ± 13.8                 | 112 ± 31.6                  | 0.3486         | 0.05 ± 0.01             | 0.03 ± 0.00             | 0.0029         |                                         |      |        |
|                     | 18:1n9        | OEA              | PLD         | 559 ± 236                   | 371 ± 109                   | 0.2            | 287 ± 42.6                  | 521 ± 206                   | 0.08           | 22.85 ± 4.51            | 14.1 ± 3.78             | 0.03           | 0.66                                    | 1.82 | 0.62   |
|                     | 18:2n6        | LEA              | PLD         | 143 ± 61.3                  | 322 ± 127                   | 0.02           | 42.5 ± 4.86                 | 127 ± 13.7                  | 0              | 4.40 ± 0.66             | 9.87 ± 1.95             | 0              | 2.3                                     | 3    | 2.25   |
|                     | 18:3n3        | aLEA             | PLD         | 0.51 ± 0.12                 | 0.60 ± 0.19                 | 0.54           | 0.45 ± 0.23                 | 0.68 ± 0.26                 | 0.14           | 0.03 ± 0.02             | 0.05 ± 0.04             | 0.57           | 1.17                                    | 1.5  | 1.5    |
|                     | 20:3n6        | DGLEA            | PLD         | 2.66 ± 0.85                 | 3.02 ± 0.54                 | 0.31           | 1.77 ± 0.37                 | 3.48 ± 0.93                 | 0.005          | 0.14 ± 0.03             | 0.17 ± 0.06             | 0.76           | 1.13                                    | 2    | 1.15   |
|                     | 20:4n6        | AEA              | PLD         | 34.7 ± 18.3                 | 36.1 ± 15.8                 | 0.6            | 8.40 ± 1.23                 | 11.13 ± 1.25                | 0.007          | 1.68 ± 0.29             | 1.77 ± 0.44             | 0.89           | 1.04                                    | 1.3  | 1.05   |
|                     | 20:5n3        | EPEA             | PLD         | 54.8 ± 17.1                 | 34.2 ± 13.4                 | 0.086          | 33.9 ± 15.2                 | 43.3 ± 22.2                 | 0.75           | ND                      | ND                      | -              | 0.62                                    | 1.27 | -      |
|                     | 22:5n6        | DEA              | PLD         | 1.38 ± 0.39                 | 2.21 ± 0.51                 | 0.02           | 1.11 ± 0.40                 | 1.99 ± 0.31                 | 0.006          | 0.21 ± 0.10             | 0.42 ± 0.14             | 0.01           | 1.6                                     | 1.8  | 2.03   |
|                     | 22:6n3        | DHEA             | PLD         | 12.7 ± 4.50                 | 11.04 ± 2.47                | 0.81           | 6.64 ± 1.01                 | 5.97 ± 1.08                 | 0.31           | 1.46 ± 0.23             | 1.21 ± 0.24             | 0.17           | 0.87                                    | 0.9  | 0.82   |
| NEFA (rel abs)      | 18:2n6        | LA               | -           | 4.88 ± 1.04                 | 8.01 ± 1.70                 | 0.005          | 5.69 ± 1.42                 | 10.1 ± 2.74                 | <.001          | .032 ± .007             | .070 ± .014             | <.001          | 1.6                                     | 1.8  | 2.18   |
|                     | 18:3n3        | ALA              | -           | 12.8 ± 3.14                 | 12.5 ± 5.12                 | 0.68           | 25.7 ± 11.8                 | 31.9 ± 21.5                 | 0.81           | .041 ± .009             | .055 ± .027             | 0.36           | 1                                       | 1.2  | 1.34   |
|                     | 20:4n6        | AA               | -           | 9.35 ± 2.14                 | 12.4 ± 3.11                 | 0.13           | 5.52 ± 1.19                 | 9.57 ± 1.10                 | <.001          | .033 ± .007             | .065 ± .010             | <.001          | 1.3                                     | 1.7  | 1.99   |
|                     | 20:5n3        | EPA              | -           | 33.9 ± 7.89                 | 29.4 ± 8.20                 | 0.45           | 34.9 ± 15.8                 | 30.4 ± 9.60                 | 0.75           | .051 ± .011             | .052 ± .020             | 0.91           | 0.9                                     | 0.9  | 1.03   |
|                     | 22:5n3        | DHA              | -           | 8.73 ± 3.26                 | 7.26 ± 1.27                 | 0.59           | 5.74 ± 1.42                 | 5.80 ± 0.88                 | 0.87           | .045 ± .009             | .048 ± .010             | 0.72           | 0.8                                     | 1    | 1.06   |
| MAG                 | 18:1n9        | 1/2-OG           | -           | 13600 ± 6340                | 7120 ± 2260                 | 0.18           | 5610 ± 2400                 | 3900 ± 603                  | 0.74           | 9905 ± 1670             | 4290 ± 608              | <.001          | 0.6                                     | 0.7  | 0.43   |
|                     | 18:2n6        | 1/2-LG           | -           | 4120 ± 1790                 | 13200 ± 2970                | <.001          | 2640 ± 1420                 | 5310 ± 1760                 | 0.02           | 1640 ± 305              | 5120 ± 1050             | <.001          | 3.2                                     | 2    | 3.12   |
|                     | 20:4n6        | 1/2-AG           | -           | 1250 ± 307                  | 1400 ± 408                  | 0.57           | 7.08 ± 0.41                 | 2540 ± 1993                 | 0.38           | 118 ± 23.7              | 158 ± 24.2              | 0.046          | 1.1                                     | 1.9  | 1.34   |
| Gly                 | 18:1n9        | NO-gly           | -           | 5.84 ± 2.42                 | 4.71 ± 1.59                 | 0.75           | 5.52 ± 2.53                 | 5.99 ± 1.06                 | 0.39           | 2.29 ± 0.48             | 1.45 ± 0.50             | 0.03           | 1.1                                     | 0.8  | 0.63   |
|                     | 20:4n6        | NA-Gly           | -           | ND                          | ND                          | -              | ND                          | ND                          | -              | 0.23 ± 0.05             | 0.39 ± 0.11             | 0.02           | -                                       | -    | 1.73   |

**Table S3 can be found in an excel spreadsheet labeled ‘Supplementary Table S3’.**

**Table S4.** Percent of total fold difference by enzymatic pathway. The sum of all fold differences (SOLF/POLF) computed in univariate analyses for those metabolites with significant fold differences within one of the three tissues measured was taken. The contribution of each pathway as a percent of the total fold difference was calculated for each tissue.

|                                               | BAT          | iWAT         | Plasma       |
|-----------------------------------------------|--------------|--------------|--------------|
| Sum of fold differences in SOLF v. POLF diets | 94.36        | 96.42        | 74.48        |
| % Auto                                        | 5.3          | 3.4          | 0.7          |
| % COX                                         | 6.3          | 5.5          | 4.7          |
| % CYP                                         | 14.9         | 14.0         | 23.6         |
| % sEH                                         | 18.8         | 21.8         | 25.7         |
| % PLD                                         | 8.5          | 14.3         | 10.8         |
| % LOX                                         | 46.2         | 41.0         | 34.5         |
| <b>Total %</b>                                | <b>100.0</b> | <b>100.0</b> | <b>100.0</b> |

**Supplementary Table S5.** Average fold difference within each enzymatic pathway. The mean (+/- SEM) was calculated using each average fold difference (SOLF/POLF) computed in univariate analyses for those metabolites with significant fold differences within one of the three tissues measured. A 1-Way ANOVA with Tukey’s post hoc test was used to determine differences in average fold difference between tissues, with P-values <.05 being significant. Letters in the subscript indicate significant (P<.05) differences between tissues as determined by Tukey’s post-hoc test.

|                   | average fold difference (POLF/SOLF) of metabolites within enzymatic pathway |                           |                            |            |
|-------------------|-----------------------------------------------------------------------------|---------------------------|----------------------------|------------|
| Enzymatic pathway | BAT                                                                         | iWAT                      | Plasma                     | P-value    |
| Auto-oxidation    | 2.51 ± 0.41 <sup>a</sup>                                                    | 1.65 ± 0.36 <sup>ab</sup> | 0.55 ± 0.275 <sup>b</sup>  | <b>.04</b> |
| COX               | 1.98 ± 0.20 <sup>a</sup>                                                    | 1.75 ± 0.16 <sup>ab</sup> | 0.275 ± 0.275 <sup>b</sup> | <b>.04</b> |
| CYP               | 2.82 ± 0.47                                                                 | 2.70 ± 0.72               | 3.51 ± 1.31                | .57        |
| sEH               | 1.97 ± 0.43                                                                 | 2.33 ± 0.31               | 2.13 ± 0.27                | .81        |
| PLD               | 1.34 ± 0.22                                                                 | 2.30 ± 0.40               | 1.36 ± 0.27                | .063       |
| LOX               | 3.11 ± 0.41                                                                 | 2.83 ± 0.40               | 3.22 ± 0.38                | .12        |
